# Supplementary material
Source: PubMed Central journal article supplement (PMC1177389)
Supplement: pnas_0504023102_3.pdf [file pnas_0504023102_3.pdf]

**Thymidylate synthase***Native -10.25 kcal/mol*

|                               |                               |                               |                                   |             |             |
|-------------------------------|-------------------------------|-------------------------------|-----------------------------------|-------------|-------------|
| PO <sub>4</sub> <sup>3-</sup> | PO <sub>4</sub> <sup>3-</sup> | PO <sub>4</sub> <sup>3-</sup> | N3, C=O<br>bidentate<br>catalytic | 3'OH        | 3'OH        |
| <b>R21</b>                    | <b>R166</b>                   | <b>S167</b>                   | <b>N177</b>                       | <b>H207</b> | <b>Y209</b> |

|                        |          |          |          |          |          |          |
|------------------------|----------|----------|----------|----------|----------|----------|
| <b>Des 1</b><br>-10.30 | <b>R</b> | <b>R</b> | <b>T</b> | <b>N</b> | <b>H</b> | <b>Y</b> |
| <b>Des 5</b><br>-10.25 | <b>R</b> | <b>R</b> | <b>S</b> | <b>N</b> | <b>H</b> | <b>Y</b> |
