# Supplementary material
Source: PubMed Central journal article supplement (PMC1177389)

**A**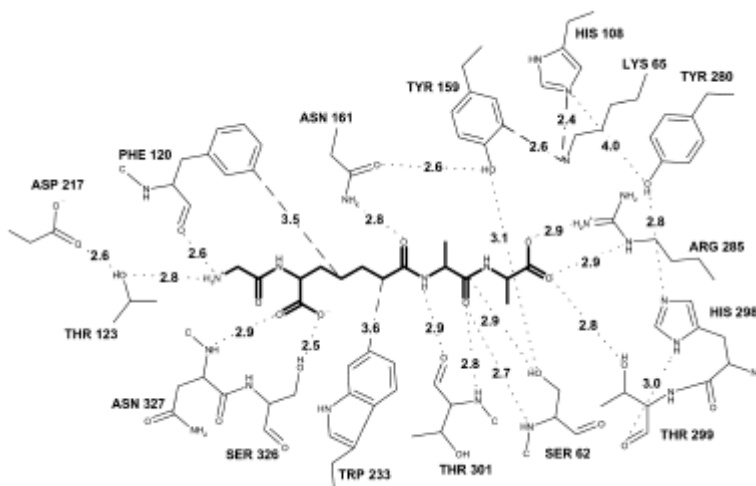**B**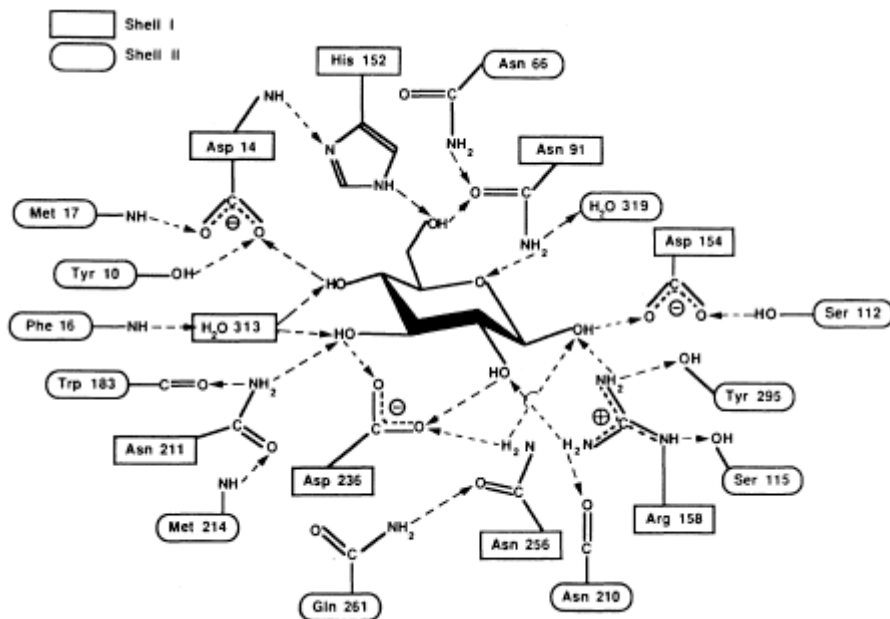

C

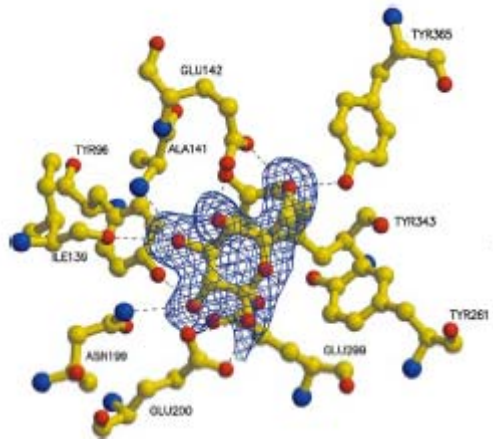

Supplement: pnas_0504023102_2.pdf [file pnas_0504023102_2.pdf]

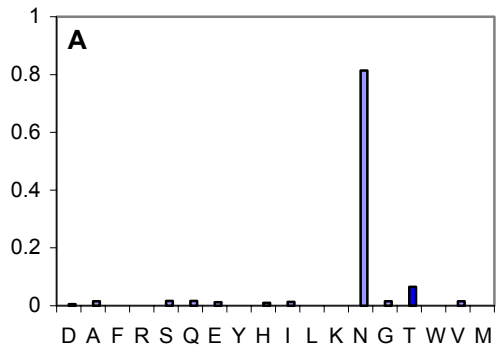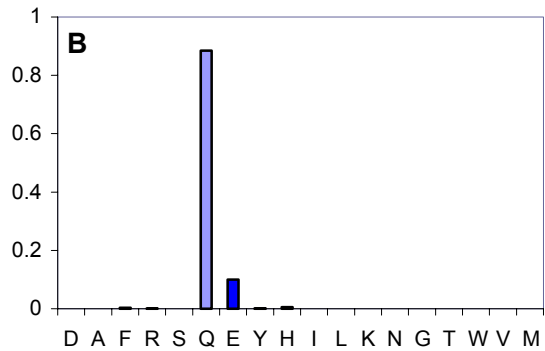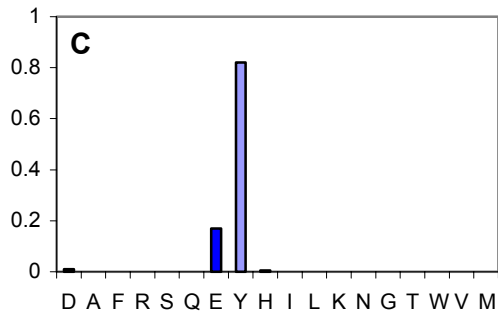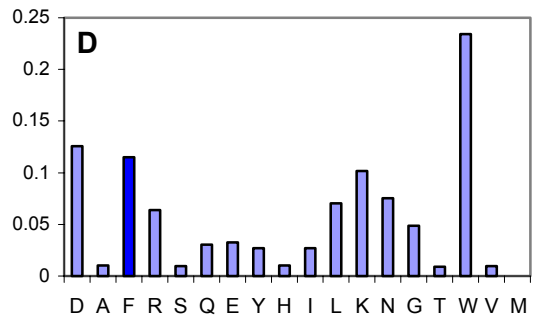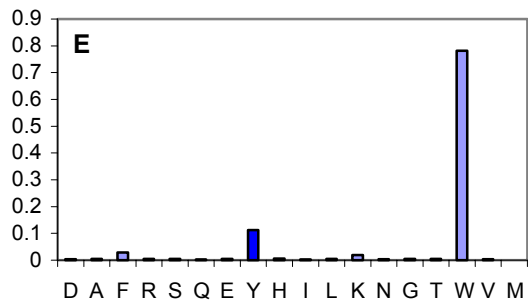

Supplement: pnas_0504023102_4.pdf [file pnas_0504023102_4.pdf]

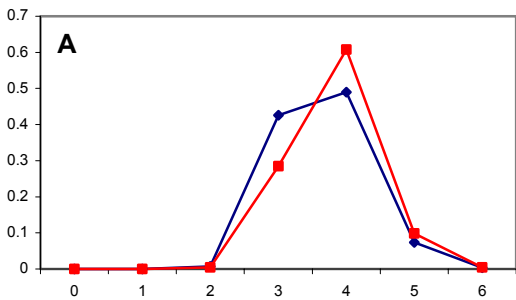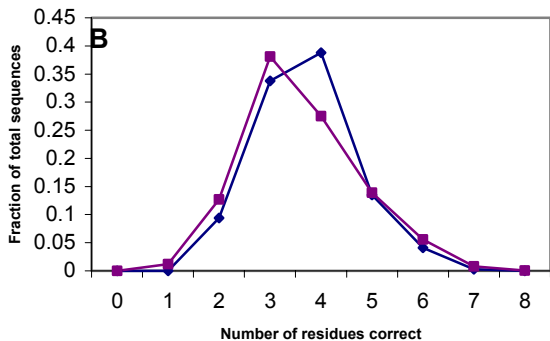

Supplement: pnas_0504023102_5.pdf [file pnas_0504023102_5.pdf]

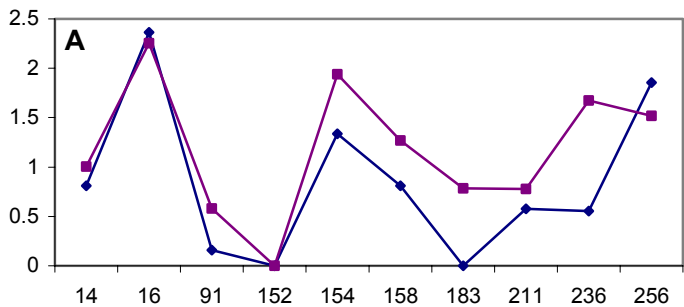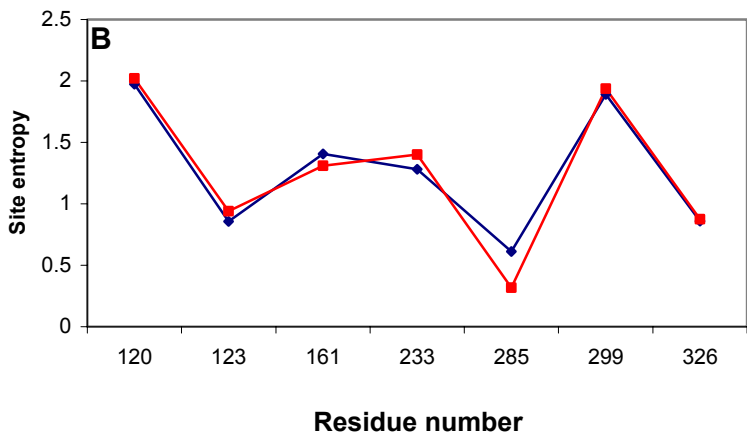

Supplement: pnas_0504023102_6.pdf [file pnas_0504023102_6.pdf]

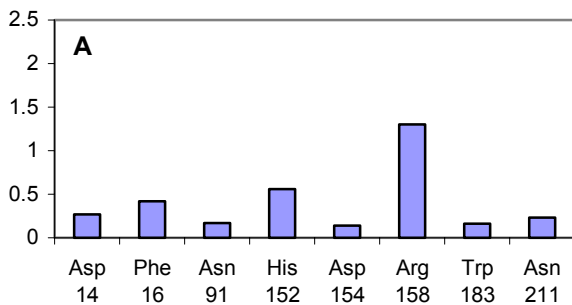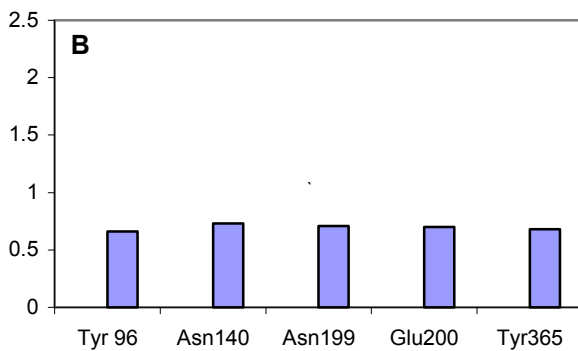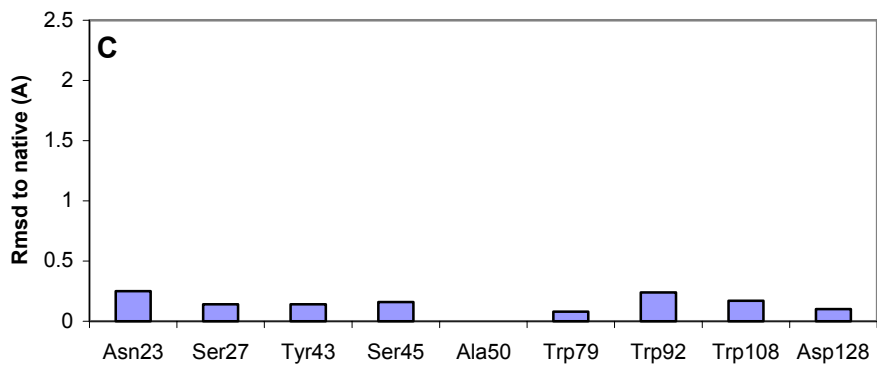

Supplement: pnas_0504023102_7.pdf [file pnas_0504023102_7.pdf]

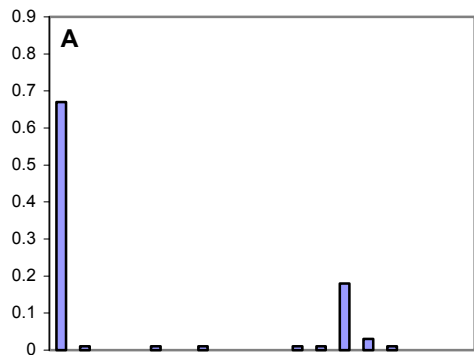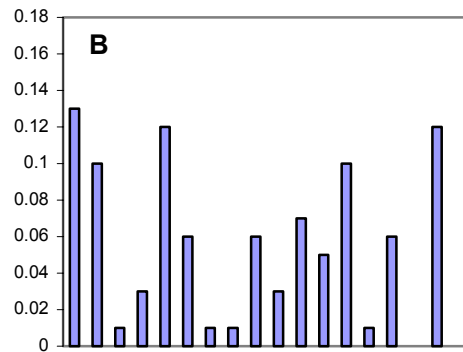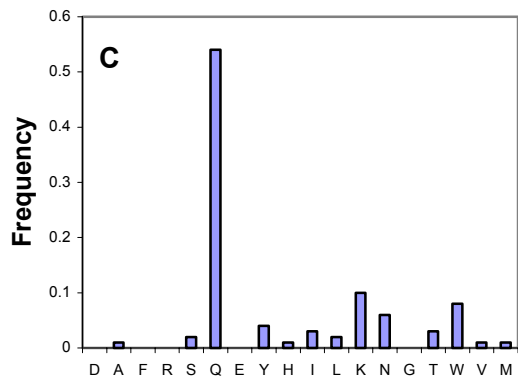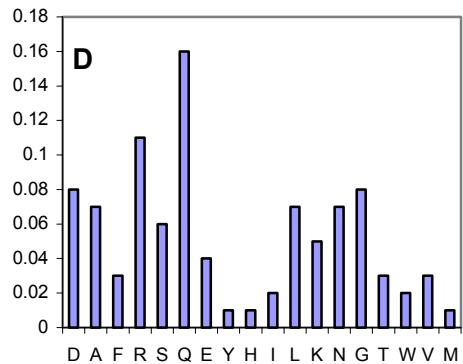

Supplement: pnas_0504023102_8.pdf [file pnas_0504023102_8.pdf]
